# Supplementary material
Source: PubMed Central journal article supplement (PMC9732708)
Supplement: NIHMS1846437-supplement-Supplement.pdf [file NIHMS1846437-supplement-Supplement.pdf]

## Supplement

Title: Sexual Dimorphic Role of CD14 in Salt Sensitive Hypertension and Renal Injury

Authors: Daniel J. Fehrenbach<sup>1,2</sup>, Justine M. Abais-Battad<sup>2</sup>, John Henry Dasinger<sup>2</sup>, Hayley Lund<sup>1</sup>, Theodore Keppel<sup>3</sup>, Jeylan Zemaj<sup>1</sup>, Mary Cherian-Shaw<sup>2</sup>, Rebekah L. Gundry<sup>3,5</sup>, Aron M. Geurts<sup>1,4</sup>, Melinda R. Dwinell<sup>1,4</sup>, David L. Mattson<sup>2</sup>

<sup>1</sup>Department of Physiology, Medical College of Wisconsin

<sup>2</sup>Department of Physiology, Augusta University and the Medical College of Georgia

<sup>3</sup>Center for Biomedical Mass Spectrometry Research, Medical College of Wisconsin

<sup>4</sup>Genomic Sciences and Precision Medicine Center, Medical College of Wisconsin

<sup>5</sup>CardiOmics Program, Center for Heart and Vascular Research; Division of Cardiovascular Medicine; and Department of Cellular and Integrative Physiology, University of Nebraska Medical Center

Short Title: CD14 Sexual Dimorphism

Word Count: 879

Corresponding author:

Daniel J Fehrenbach

Daniel.fehrenbach@vumc.org

Address:

Department of Medicine

Division of Clinical Pharmacology

Vanderbilt University Medical Center

MRB4 (Langford), p410

2213 Garland Ave.

Nashville, TN 37232

## Supplement

Supplementary Methods:

### Sample Digestion

Cell pellets were each suspended in 240  $\mu\text{L}$  100 mM ammonium bicarbonate, 120  $\mu\text{L}$  acetonitrile, and 240  $\mu\text{L}$  Invitrosol LC/MS Protein Solubilizer (5X solution, Thermo Scientific) to enhance digestion efficiency for membrane proteins.<sup>1</sup> The microcentrifuge tubes were then sonicated until the pellet was no longer visible. 33  $\mu\text{L}$  of 100 mM TCEP was added to each tube. Tubes were vortexed then incubated with shaking at 37 °C and 1400 rpm for 30 minutes. 66  $\mu\text{L}$  100 mM iodoacetamide was added to each tube and tubes were incubated with shaking for another 30 minutes in the dark. 20  $\mu\text{g}$  sequencing grade trypsin (Promega) was added to each tube and digestion proceeded at 37 °C and 1400 rpm overnight. 30  $\mu\text{L}$  10% trifluoroacetic acid (TFA) was added to each tube to quench digestion. Samples were dried down then each resuspended in 300  $\mu\text{L}$  water prior to sample desalting and clean up by SP2 method.<sup>2</sup> Peptide concentrations were determined using Pierce Quantitative Fluorometric Peptide Assay (Thermo). Samples were prepared as 100 ng/ $\mu\text{L}$  total peptide concentration with Pierce Peptide Retention Time Calibration Mixture (PRTC, Thermo) spiked in to a final concentration of 2 fmol/ $\mu\text{L}$  PRTC.

### Mass Spectrometry Analysis

Samples were analyzed as 500 ng total peptide per injection on Dionex UltiMate 3000 RSLCnano in-line with a Thermo Scientific Orbitrap Fusion Lumos MS via 2 technical replicate injections using a data-dependent acquisition (DDA) instrument method outlined in Table 1. Mass Spectrometry data were analyzed using Proteome Discoverer 2.2 (Thermo) platform as outlined in the Table 2. Protein identifications were filtered to include only those proteins identified by two or more unique peptides identified and ranked as high confidence. Identified peptides matching wild-type or mutant CD14 sequences were then used to generate an isolation (target) list for follow up parallel reaction monitoring (PRM) analyses. Additionally, non-detected peptides generated from theoretical tryptic digests of both sequences were also included in the isolation list. Equivalent 500 ng sample peptide injections were analyzed using the same nanoLC chromatography parameters as in the DDA analysis. For generation of MS<sup>2</sup> fragment spectra, the MS was operated to isolate, fragment, and analyze specific  $m/z$  ions as defined in the isolation list. The PRM instrument method is outlined in Table 3. Peptide feature peak areas were obtained using Skyline software.<sup>3</sup>

### References

1. Waas M, Bhattacharya S, Chuppa S, Wu X, Jensen DR, Omasits U, Wollscheid B, Volkman BF, Noon KR, Gundry RL. Combine and conquer: Surfactants, solvents, and chaotropes for robust mass spectrometry based analyses of membrane proteins. *Anal Chem.* 2014;86:1551-1559
2. Waas M, Pereckas M, Jones Lipinski RA, Ashwood C, Gundry RL. Sp2: Rapid and automatable contaminant removal from peptide samples for proteomic analyses. *J Proteome Res.* 2019;18:1644-1656
3. MacLean B, Tomazela DM, Shulman N, Chambers M, Finney GL, Frewen B, Kern R, Tabb DL, Liebler DC, MacCoss MJ. Skyline: An open source document editor for creating and analyzing targeted proteomics experiments. *Bioinformatics.* 2010;26:966-968

## Supplement

| <b>Table S1. Chromatography and MS instrument acquisition settings for Discovery (DDA) Analysis</b> |                                            |                                        |                                          |
|-----------------------------------------------------------------------------------------------------|--------------------------------------------|----------------------------------------|------------------------------------------|
| <i>Sample Volume</i>                                                                                | 5 $\mu$ L                                  | <i>MS<sup>2</sup> acquisition</i>      | Data dependent, 3 s cycle time, Centroid |
| <i>Stationary Phase</i>                                                                             | C <sub>18</sub>                            | <i>MS<sup>2</sup> Fragmentation</i>    | HCD                                      |
| <i>LC Solvent A</i>                                                                                 | 100% H <sub>2</sub> O,<br>0.1% formic acid | <i>MS<sup>2</sup> Detection</i>        | Orbitrap                                 |
| <i>LC Solvent B</i>                                                                                 | 80% ACN,<br>0.1% formic acid               | <i>MS<sup>2</sup> fixed first mass</i> | 110 m/z                                  |
| <i>Gradient Ramp Duration</i>                                                                       | 6-30% B<br>128 minutes                     | <i>MS<sup>2</sup> resolution</i>       | 30,000 @ 400 m/z                         |
| <i>Flow Rate</i>                                                                                    | 300 nL/min                                 |                                        |                                          |
| <i>Mass Spectrometer</i>                                                                            | Thermo Orbitrap Fusion Lumos               | <i>Isolation Window</i>                | 1.6 m/z                                  |
| <i>Spray Voltage</i>                                                                                | 2.0 kV                                     | <i>MS<sup>2</sup> AGC Target</i>       | 5e4                                      |
| <i>In-Source CID</i>                                                                                | 0.0 eV                                     | <i>MS<sup>2</sup> Maximum IT</i>       | 110 ms                                   |
| <i>MS<sup>1</sup> scan range</i>                                                                    | 375-1500 m/z                               | <i>Normalized Collision Energy</i>     | 30                                       |
| <i>MS<sup>1</sup> resolution</i>                                                                    | 120,000 @ 400 m/z                          | <i>Minimum Intensity Req.</i>          | 5000                                     |
| <i>MS<sup>1</sup> AGC Target</i>                                                                    | 4e5                                        | <i>Dynamic Exclusion</i>               | 60.0 s                                   |
| <i>MS<sup>1</sup> Maximum IT</i>                                                                    | 50 ms                                      |                                        |                                          |

| <b>Table S2. DDA search parameters</b> |                                                          |                                           |                                         |
|----------------------------------------|----------------------------------------------------------|-------------------------------------------|-----------------------------------------|
| <i>Platform</i>                        | ProteomeDiscoverer 2.2                                   | <i>Static Modifications</i>               | Carbamidomethyl (C)                     |
| <i>Search Algorithms</i>               | SequestHT                                                | <i>Dynamic Modifications</i>              | Oxidation (M), Acetylation (N-terminus) |
| <i>Validation</i>                      | Percolator<br>Peptide Validator<br>Protein FDR Validator | <i>Target FDR (Strict) for PSMs:</i>      | 0.01                                    |
| <i>Database</i>                        | UniProt; Rat; created 10/03/2017                         | <i>Target FDR (Relaxed) for PSMs:</i>     | 0.05                                    |
| <i>Digest</i>                          | Trypsin (semi)<br>2 Missed Cleavages Allowed             | <i>Target FDR (Strict) for Peptides:</i>  | 0.01                                    |
| <i>Precursor mass tolerance</i>        | 10 ppm                                                   | <i>Target FDR (Relaxed) for Peptides:</i> | 0.05                                    |
| <i>Fragment mass tolerance</i>         | 0.02 Da                                                  |                                           |                                         |

## Supplement

**Table S3.** MS instrument acquisition settings for Targeted (PRM) Analysis

|                                  |                              |                                     |                    |
|----------------------------------|------------------------------|-------------------------------------|--------------------|
| <i>Mass Spectrometer</i>         | Thermo Orbitrap Fusion Lumos | <i>MS<sup>2</sup> acquisition</i>   | Targeted, Centroid |
| <i>Spray Voltage</i>             | 2.0 kV                       | <i>MS<sup>2</sup> Fragmentation</i> | HCD                |
| <i>In-Source CID</i>             | 0.0 eV                       | <i>MS<sup>2</sup> Detection</i>     | Orbitrap           |
| <i>MS<sup>1</sup> scan range</i> | 375-1500 m/z                 | <i>MS<sup>2</sup> scan range</i>    | 120-1200 m/z       |
| <i>MS<sup>1</sup> resolution</i> | 120,000 @ 400 m/z            | <i>MS<sup>2</sup> resolution</i>    | 30,000 @ 400 m/z   |
| <i>MS<sup>1</sup> AGC Target</i> | 4e5                          | <i>Isolation Window</i>             | 1.6 m/z            |
| <i>MS<sup>1</sup> Maximum IT</i> | 50 ms                        | <i>MS<sup>2</sup> AGC Target</i>    | 1e5                |
|                                  |                              | <i>MS<sup>2</sup> Maximum IT</i>    | 100 ms             |
|                                  |                              | <i>Normalized Collision Energy</i>  | 30                 |

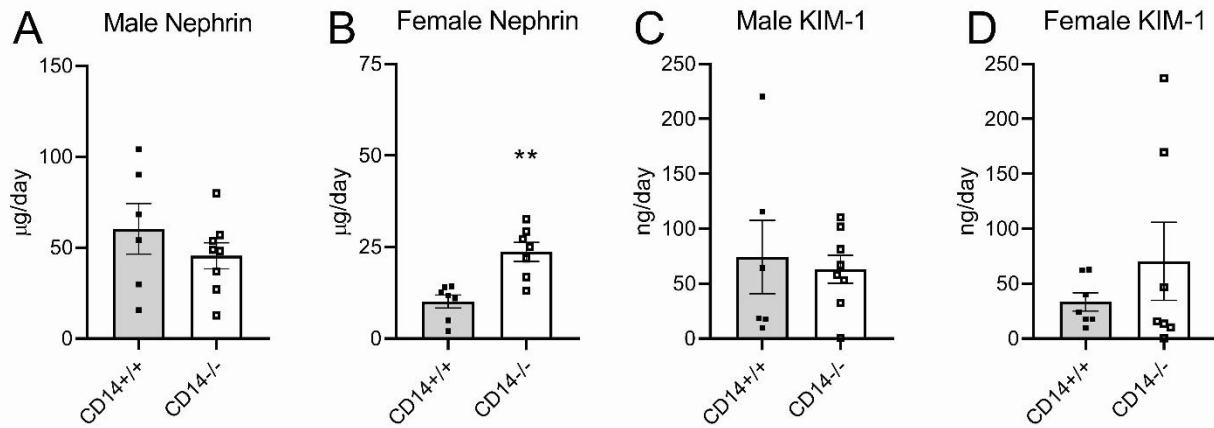

Fig S1. Additional markers of renal damage (Nephrin A/B and Kidney Injury Molecule-1 [KIM-1] C/D) were measured in the urine of male and female CD14<sup>+/+</sup> and CD14<sup>-/-</sup> Dahl SS rats after a three-week high salt challenge. n=6-8 \*\*p<0.01

## Supplement

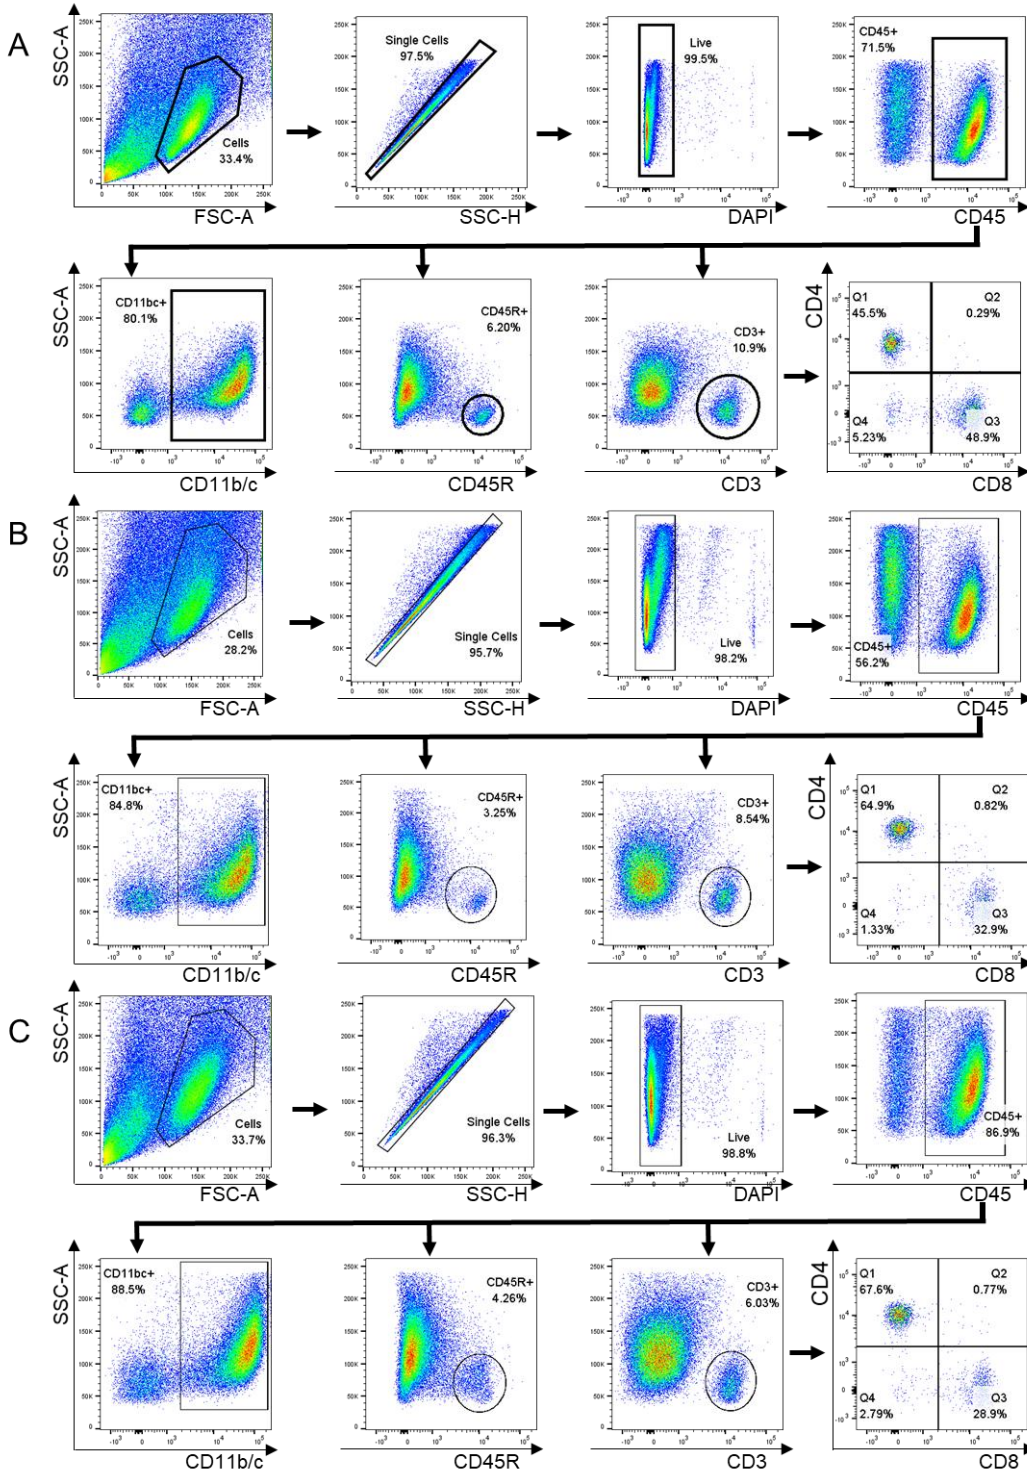

Fig S2. General Gating strategy for identifying renal immune cell populations by flow cytometry (A). CD45 identifies leukocytes from which gates are placed for CD11b/c+ macrophages, CD45R+ B cells, and CD3+ T cells. From the T cell population, CD4+ helper T cells and CD8+ cytotoxic T cells respectively. Representative flow cytometry plots from bone marrow transplant recipients receiving either CD14+/+ (B) or CD14-/- (C) bone marrow.
